# Supplementary material
Source: Springer Nature journal article supplement (https://www.springermedizin.de/resource/supplementary/12955_2003_55_MOESM1_ESM.pdf/9558464)

KOOS

Expert  
Panel of  
Patients,  
PT, MD  
N = 20

Face and Content  
Validity

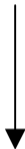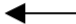

RAOS

In-patients  
N = 119

Reliability, Construct  
Validity and  
Responsiveness

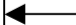

Supplement: MOESM1 [file 9558464]
